# Supplementary material
Source: PubMed Central journal article supplement (PMC4589488)
Supplement: NIHMS711001-supplement-01.pdf [file NIHMS711001-supplement-01.pdf]

## 15-00843 Supplementary Tables

**Supplementary Table 1: List of potential prognostic histone modification markers in colorectal cancer**

| Histone              | Active/Inactive mark | Source                        | Number of patients | Dysregulation in CRC tissues        | Method | Reference                      |
|----------------------|----------------------|-------------------------------|--------------------|-------------------------------------|--------|--------------------------------|
| <b>Active mark</b>   |                      |                               |                    |                                     |        |                                |
| H3K4me3              | active               | primary tissues               | 121 (Stage I/II)   | high levels indicate poor prognosis | IHC    | Benard et al. <sup>154</sup>   |
| H3K56ac              | active               | primary tissues               | 254                | low levels indicate poor prognosis  | IHC    | Benard et al. <sup>155</sup>   |
| H4K16ac              | active               | primary tissues               | 254                | low levels indicate poor prognosis  | IHC    | Benard et al. <sup>155</sup>   |
| <b>Inactive mark</b> |                      |                               |                    |                                     |        |                                |
| H3K9me2              | inactive             | tissues in hepatic metastasis | 54                 | low levels indicate poor prognosis  | IHC    | Tamagawa et al. <sup>153</sup> |
| H3K9me3              | inactive             | primary tissues               | 121 (Stage I/II)   | low levels indicate poor prognosis  | IHC    | Benard et al. <sup>154</sup>   |
| H3K27me2             | inactive             | primary tissues               | 54                 | low levels indicate poor prognosis  | IHC    | Tamagawa et al. <sup>156</sup> |
| H4K20me3             | inactive             | primary tissues               | 121 (Stage I/II)   | low levels indicate poor prognosis  | IHC    | Benard et al. <sup>154</sup>   |

**Supplementary Table 2: List of potential prognostic lncRNA markers in colorectal cancer**

| LncRNA                          | Genomic location | Description of the lncRNA                              | Function in tumorigenesis of CRC       | Functional mechanism                         | Reference                       |
|---------------------------------|------------------|--------------------------------------------------------|----------------------------------------|----------------------------------------------|---------------------------------|
| <b>Oncogenic lncRNA</b>         |                  |                                                        |                                        |                                              |                                 |
| HOTAIR                          | Chr12q13.13      | Homeobox Transcript Antisense Intergenic RNA           | invasion, migration                    | Gene silencing by binding to PRC2 and LSD1   | Svoboda et al. <sup>286</sup>   |
| PCAT-1                          | Chr8q24.21       | Prostate cancer-associated ncRNA transcripts 1         | -                                      | Transcriptional repression                   | Ge et al. <sup>347</sup>        |
| PVT-1                           | Chr8q24.21       | -                                                      | proliferation, invasion                | A p53-inducible target miR-1204              | Takahashi et al. <sup>348</sup> |
| MALAT-1                         | Chr11q13.1       | Metastasis associated lung adenocarcinoma transcript 1 | proliferation, invasion, migration     | Modulating RNA splicing; protein interaction | Zheng et al. <sup>288</sup>     |
| 91H                             | Chr11p15.5       | H19 antisense RNA                                      | proliferation, migration, invasiveness | Unknown                                      | Deng et al. <sup>349</sup>      |
| UCA1                            | Chr19p13.12      | Urothelial carcinoma-associated 1                      | proliferation, apoptosis               | Unknown                                      | Han et al. <sup>350</sup>       |
| LSINCT5                         | Chr5p15.33       | Long stress-induced non-coding transcript 5            | proliferation, invasion                | Unknown                                      | Xu et al. <sup>351</sup>        |
| <b>Tumor-suppressive lncRNA</b> |                  |                                                        |                                        |                                              |                                 |
| uc.73a                          | Chr2q22.3        | -                                                      | proliferation, apoptosis               | Unknown                                      | Calin et al. <sup>352</sup>     |
| LOC285194                       | chr3q13.31       | -                                                      | -                                      | Unknown                                      | Qi et al. <sup>353</sup>        |
| ncRAN                           | Chr17q25.1       | Non-coding RNA expressed in aggressive neuroblastoma   | invasion, migration                    | Unknown                                      | Qi et al. <sup>354</sup>        |
| RP11-462C24.1                   | chr4q25          | -                                                      | -                                      | Unknown                                      | Shi et al. <sup>355</sup>       |
| GAS5                            | Chr1q25.1        | Growth arrest-specific 5                               | -                                      | Titrate GR away from target genes            | Yin et al. <sup>356</sup>       |
| MEG3                            | Chr14q32.2       | Maternally expressed gene 3                            | proliferation                          | Modulation TP53 and Rb related pathway       | Yin et al. <sup>357</sup>       |
